1 **Risk and protective factors of feline tooth resorption in 8115 Finnish cats**

2 Katariina Vapalahti<sup>1,2</sup> ¶, Henriikka Neittaanmäki<sup>1</sup>¶, Hannes Lohi<sup>1,2,3\*</sup>, Anna-Maija Virtala<sup>1</sup>

3

4 <sup>1</sup>Department of Veterinary Biosciences, University of Helsinki

5 <sup>2</sup>Department of Medical and Clinical Genetics, University of Helsinki

6 <sup>3</sup>Folkhälsan Research Center

7

8 \*Corresponding author

9 Email: Hannes.lohi@helsinki.fi

10 ¶ These authors contributed equally to this work.

## 11 **Abstract**

12 Tooth resorption (TR) is the most common dental disease in cats. It causes painful lesions in the teeth,  
13 the only treatment being tooth extraction. The prevalence of the TR is high in clinical studies while  
14 the estimate in the population sample is unknown. The aetiology of the disease remains unclear, but  
15 associations to old age, breed, other oral and dental diseases, viral infections and certain  
16 environmental factors have been suspected. We wanted to determine the prevalence, risk factors and  
17 heredity of feline TR in a population sample of Finnish cats. We collected health and environmental  
18 information of 8115 Finnish cats in 41 breeds through an online survey targeted for breeders and  
19 owners. The prevalence of veterinary-diagnosed TR was 3.9% in the whole data and 15% in cats  
20 diagnosed with oral or dental disease. Results indicated an increased risk by age and decreased risk  
21 by constantly available food. Periodontitis and stomatitis were more common in the TR-affected cats.  
22 The interaction between gingivitis, dental calculus, and age suggests that the predisposition of young  
23 cats to TR is associated with gingivitis, which could partially be prevented by proper dental hygiene.  
24 The observed differences between breeds highlight the genetic contribution.

25

## 26 **Introduction**

27 Tooth resorption (TR) is the most common dental disease in cats [1]. It is a painful disease  
28 characterised by progressive dental destruction, which eventually results in loss of teeth. Dental  
29 radiography is necessary to evaluate the overall situation [1]. Prevention of the disease is not possible  
30 since the aetiology is still unknown. The goal of treatment is to relieve the pain and discomfort caused  
31 by these lesions [2]. The main cause of destruction are odontoclasts, which are multinuclear cells that  
32 resorb mineralized tissue [3]. Odontoclasts are responsible for resorption of deciduous teeth in young  
33 animals, but their abnormal activity in permanent teeth is the cause of TR [4]. The reason for this  
34 process remains unclear, although many different theories have been proposed. Tooth resorption can

35 include plaque accumulation, inflammation of the adjacent tissue and alveolar bone ankylosis [5].  
36 Because the pathogenesis of tooth resorption has been unclear, many different terms have been used  
37 to describe the lesion, i.e. erosion, neck lesion, FORL (feline odontoclastic resorptive lesion).  
38 Nowadays, most used term is TR.  
39  
40 TR is a relatively new disease, which has become more common in the last decades [6]. Almost no  
41 resorptions could be found in feline skulls from the 1930–1950’s but starting from 1960’s they were  
42 increasing in number [7]. First publication about TR came out in 1955 [6]. The size and origin of the  
43 study population have had a major impact on the reported prevalence of TR in previous studies  
44 varying from 29-85% (Table 1). Most studies are based on a small clinical sample (n< 150) and no  
45 reports have been published yet in a large population sample. TR exists also in large cats, such as  
46 leopards and lions, but rarely in humans and dogs [1]. The increasing number of tooth resorption  
47 indicates a change in the environment of domestic cats [4]. For example, the factors preventing  
48 resorption in the outer surface of the teeth could have been compromised [1]. Only lesions that occur  
49 in the crown or in the cemento-enamel junction can be detected clinically [1]. However, resorption  
50 can occur at any surface of the teeth or in the root and can lead to massive destruction in the adjacent  
51 tissue.

52

53 **Table 1.** Prevalence of feline tooth resorption in previous studies. NK = not known

| Reference                  | Country     | Target population   | Study population (n), average age (years) | Method   | Prevalence (%) |
|----------------------------|-------------|---------------------|-------------------------------------------|----------|----------------|
| Coles 1990 [13]            | Australia   | General anaesthesia | 64, NK                                    | Clinical | 52             |
| van Wessum et al. 1992 [7] | Netherlands | Dental procedure    | 432, NK                                   | Clinical | 62             |

|                                   |                |                                                                |           |                          |          |
|-----------------------------------|----------------|----------------------------------------------------------------|-----------|--------------------------|----------|
| van Wessum et al. 1992 [7]        | United States  | Dental procedure                                               | 78, NK    | Clinical and radiographs | 67       |
| Lund et al. 1998 [15]             | United States  | General anaesthesia                                            | 145, 7.9  | Clinical                 | 48       |
| Ingham et al. 2001 [16]           | United Kingdom | Clinically healthy test animals                                | 228, 4.9  | Clinical and radiographs | 29       |
| Pettersson & Mannerfelt 2003 [17] | Sweden         | Sedation                                                       | 96, 6.0   | Clinical and radiographs | 32       |
| DeLaurier et al. 2009 [5]         | United States  | Clinically and radiographically normal teeth                   | 13, NK    | Electron microscopy      | 85       |
| Our study                         | Finland        | Finnish cat population: all / cats with oral or dental disease | 8115, 5.3 | Questionnaire            | 3.9 / 15 |

54

55 American Veterinary Dental College has developed a classification for tooth resorption based on their  
56 radiographic appearance. In type 1 tooth resorption there is a focal radiolucent area in the tooth that  
57 appears otherwise normal with a normal periodontal ligament space. In type 2 tooth resorption, there  
58 is decreased radiopacity, which indicates that the root is being replaced with alveolar bone. In type 3  
59 tooth resorption, there are signs of both type 1 and type 2 resorptions [8,9]. The same cat can suffer  
60 from different types of resorptions [9]. The three resorption types have been suspected to have  
61 different aetiologies [10].

62

63 Unlike the previous clinical studies, our aim was to investigate the prevalence of veterinary-diagnosed  
64 TR, its risk factors and variation between breeds in a large population sample of Finnish cats collected  
65 during 2012–2015 using an online feline health survey data [11].

66

## 67 **Results**

68

### 69 **Prevalence**

70 Our cat population consisted of 8115 cats in 41 breeds, of which 4290 (53%) were females. 2070  
71 (26%) cats were diagnosed with oral or dental disease and 316 cats had veterinarian diagnosed TR.

72 The mean age of the cat population was 5.3 years - for cats without TR 5.1 and for cats with  
73 veterinarian diagnosed TR 9.8 years. The prevalence of veterinary-diagnosed TR in our study was  
74 3.9% (95% CI 3.5–4.3%, Table 1). The prevalence increased strongly by age, being 0.4% in 1 to <3  
75 years old, 3.0% in 3 to <7 years old, 8.8% in 7 to <11 years old, and 11.6% in at least 11 years old  
76 cats. TR was not reported in cats under one year of age. For comparison, in subgroup of cats that had  
77 been diagnosed with oral or dental disease, the prevalence of TR was 15.2% (95% CI 13.5–16.8%,  
78 Table 1), increasing again by age 3.7%, 12.6%, 24.3% and 28.1%, respectively.

79

80 We did not find any significant difference between the TR prevalence in purebred cats and non-  
81 pedigree house cats (3.8%; CI 3.4–4.3% and 4.2% and CI 3.3–5.3%, respectively,  $P = 0.551$ , Fisher).

82 However, in some breeds, the prevalence was much higher or lower than in the entire population or  
83 in-house cats – high in Siamese (9.9%), Abyssinian (9.3%), Oriental Shorthair (9.1%) and Cornish  
84 Rex (8.9%), and much lower than average in Turkish Van (0.4%) and Birman (1.3%). TR was not  
85 reported in breeds of Burmilla, American Shorthair, Don Sphynx, Egyptian Mau, Kurilian Bobtail,  
86 Manx, Neva Masquerade and Seychellois. However, these breeds were present in low numbers in our  
87 dataset.

88

### 89 **Factors associated with tooth resorption**

90 Total of 15 factors were qualified into the final multivariable logistic regression modelling for finding  
 91 out the most significant factors associated to TR. They were age, breed, gender, availability of food,  
 92 gingivitis, stomatitis, periodontitis, dental calculus, tooth fracture, abnormal number of teeth, cat flu,  
 93 musculoskeletal disease, digestive tract disease, respirator system disease and endocrinological  
 94 disease and tumours. These 15 factors were selected out of 51 (Supplementary Table S1) factors from  
 95 the feline health survey [11], which were known to be or could possibly be related to TR.  
 96 Qualification by basic association tests (Fishers' exact or Kruskal-Wallis,  $p > 0.2$ ) suppressed the  
 97 number of factors from 51 to 26 (Table 2, Supplementary Tables S2 and S3). Logistic regression  
 98 modelling with confounding factors age, gender and breed - for each of the 26 variables separately -  
 99 favoured 15 factors ( $p < 0.05$ ) (Supplementary Tables S2 - S4) to be approved into the final  
 100 multivariable logistic regression modelling. Majority of the cats - 92% of cases and 78 % of controls  
 101 - were neutered and thus, too small comparison groups of non-neutered cats prevented validation of  
 102 the effect of neutering in obtaining TR.

103

104 **Table 2.** Demographics and basic association test results (breed and disease categories excluded) of  
 105 cats with and without veterinarian diagnosed tooth resorption (N = 8115); number (n), percentage  
 106 (%) and association with tooth resorption (only  $P < 0.2$  shown) in Finnish cats in feline health survey  
 107 12/2012–2/2015. P-value: Fisher or Kruskal-Wallis test. CI = confidence interval. Bolded: selected  
 108 for further analysis in logistic regression model with confounding factors age, gender and breed. Same  
 109 cat may have had several of the oral/dental diseases or viral infections.

| Variable                   | Diagnosed |      |           | Not diagnosed |      |           | P-value          |
|----------------------------|-----------|------|-----------|---------------|------|-----------|------------------|
|                            | n         | %    | 95% CI    | n             | %    | 95% CI    |                  |
| <b>Age</b>                 | 311       |      |           | 7631          |      |           | <b>&lt;0.001</b> |
| < 1 yr                     | 0         | 0.0  | 0.0–1.2   | 1119          | 14.7 | 13.9–15.5 |                  |
| 1–2.99 yrs                 | 8         | 2.6  | 1.3–5.0   | 1973          | 25.9 | 24.9–26.8 |                  |
| 3–6.99 yrs                 | 76        | 24.4 | 20.0–29.5 | 2490          | 32.6 | 31.6–33.7 |                  |
| 7–10.99 yrs                | 115       | 37.0 | 31.8–42.5 | 1197          | 15.7 | 14.9–16.5 |                  |
| ≥11 yrs                    | 112       | 36.0 | 30.9–41.5 | 852           | 11.2 | 10.5–11.9 |                  |
| <b>Gender</b>              | 313       |      |           | 7742          |      |           | <b>0.184</b>     |
| Female                     | 155       | 49.5 | 44.0–55.0 | 4135          | 53.4 | 52.3–54.5 |                  |
| Male                       | 158       | 50.5 | 45.0–56.0 | 3607          | 46.6 | 45.5–47.7 |                  |
| <b>Oral/dental disease</b> |           |      |           |               |      |           |                  |
| Gingivitis                 | 109       | 34.5 | 29.5–39.9 | 499           | 6.4  | 5.9–7.0   | <b>&lt;0.001</b> |
| Stomatitis                 | 18        | 5.7  | 3.6–8.8   | 43            | 0.6  | 0.4–0.7   | <b>&lt;0.001</b> |

| Variable                            | Diagnosed |      |           | Not diagnosed |      |           | P-value |
|-------------------------------------|-----------|------|-----------|---------------|------|-----------|---------|
|                                     | n         | %    | 95% CI    | n             | %    | 95% CI    |         |
| Periodontitis                       | 36        | 11.4 | 8.3–15.4  | 68            | 0.9  | 0.7–1.1   | <0.001  |
| Dental calculus                     | 187       | 59.2 | 53.7–64.5 | 1407          | 18.0 | 17.2–18.9 | <0.001  |
| Tooth fracture                      | 16        | 5.1  | 3.1–8.1   | 90            | 1.2  | 0.9–1.4   | <0.001  |
| Abnormal number of teeth            | 12        | 3.8  | 2.2–6.5   | 63            | 0.8  | 0.6–1.0   | <0.001  |
| <b>Viral infections</b>             |           |      |           |               |      |           |         |
| Cat flu                             | 20        | 6.3  | 4.1–9.6   | 201           | 2.6  | 2.2–3.0   | 0.001   |
| Feline infectious peritonitis (FIP) | 1         | 0.3  | 0.1–1.8   | 110           | 1.4  | 1.2–1.7   | 0.133   |
| <b>Diet</b>                         |           |      |           |               |      |           |         |
| Cooked meat/fish                    | 88        | 27.8 | 23.2–33.0 | 1812          | 23.2 | 22.3–24.2 | 0.067   |
| Availability of food                | 166       | 53.2 | 47.7–58.7 | 5287          | 68.9 | 67.9–70.0 | <0.001  |
| <b>Vaccinations</b>                 |           |      |           |               |      |           |         |
| Cat flu                             | 201       | 70.3 | 64.7–75.3 | 4907          | 74.2 | 73.1–75.2 | 0.148   |
| Panleucopenia                       | 239       | 83.6 | 78.8–87.4 | 5752          | 86.6 | 85.8–87.4 | 0.157   |
| Leukaemia                           | 28        | 12.8 | 9.0–17.9  | 936           | 20.0 | 18.8–21.1 | 0.009   |
| Rabies                              | 80        | 32.4 | 26.9–38.5 | 2649          | 46.0 | 44.7–47.3 | <0.001  |

110

## 111 **Multivariable logistic regression model**

112 Seven variables remained in the final multivariable logistic regression model after model validation  
 113 with backward selection and goodness of fit tests (Table 3). Based on the model, independent risk  
 114 factors for veterinarian-diagnosed TR were breed, stomatitis and periodontitis whereas availability of  
 115 food constantly had a significant protective effect.

116

117 Breeds and breed groups with significantly higher risk for tooth resorption in comparison to house  
 118 cats were oriental group (Siamese, Balinese, Oriental, Seychellois), British, Cornish Rex, European,  
 119 Norwegian Forest Cat and Ragdoll. Turkish Van had significantly lower risk for TR. Those cats,  
 120 which did not have food available all the time as well as cats, which had stomatitis or periodontitis  
 121 were more prone to TR than other cats.

122

123 The second order interaction was found between age, gingivitis and dental calculus. The interaction  
 124 demonstrated that there was considerable variation in the risk to have TR in the groups indicated by  
 125 these interaction factors (Fig 1). Gingivitis was a significant risk factor for TR in age groups of < 7  
 126 years and  $\geq 11$  years old cats, and the risk of having TR due to gingivitis was highest in the subgroup  
 127 of young cats (< 7 years) having gingivitis but not dental calculus (Table 3).

128

129 Even though the P-value of the second order interaction was non-significant (0.0949) in this model,  
 130 it gathered the information of the three separate significant interactions explicitly and the model  
 131 achieved the best AIC and AUC values and McFadden index. The AIC was 2004. The AUC-value  
 132 for the ROC-curve was 0.870 (95% CI 0.850–0.890), which makes the predictive value of the model  
 133 moderate [12]. The McFadden goodness of fit index was 0.255. The goodness of fit and predictive  
 134 value tests for the final model were mainly good or moderate.

135

136 **Table 3.** Multivariable logistic regression model of the risk factors for veterinarian diagnosed tooth  
 137 resorption in Finnish cats in data collected during 12/2012–2/2015 in an internet survey. Only  
 138 significant breeds are shown. B = logistic regression model coefficient, se = Standard Error, Wald =  
 139 Wald test statistic, df = degrees of freedom, P = Wald's P-value, OR = odds ratio, CI = confidence  
 140 interval for OR, ref = reference group.  $n_{\text{cases}}=308$  and  $n_{\text{controls}}=7508$ . P-values of the first order  
 141 interactions age x gingivitis, age x dental calculus and gingivitis x dental were 0.003, 0.0003 and  
 142 0.0002, respectively.

| Variable                                    | B     | se   | Wald   | P      | OR   | 95% CI      | df |
|---------------------------------------------|-------|------|--------|--------|------|-------------|----|
| <b>Constant</b>                             | -5.25 | 0.26 | 410.40 | <0.001 |      |             | 1  |
| <b>Breed: House cat</b>                     | ref   |      |        |        |      |             | 20 |
| Siamese, Balinese,<br>Oriental, Seychellois | 0.72  | 0.25 | 8.25   | 0.004  | 2.05 | 1.26 – 3.36 | 1  |
| British                                     | 0.65  | 0.32 | 4.23   | 0.040  | 1.92 | 1.03 – 3.58 | 1  |
| Cornish Rex                                 | 1.14  | 0.25 | 20.39  | <0.001 | 3.12 | 1.90 – 5.11 | 1  |
| European                                    | 0.89  | 0.29 | 9.54   | 0.002  | 2.44 | 1.39 – 4.31 | 1  |
| Norwegian Forest Cat                        | 0.64  | 0.29 | 4.97   | 0.026  | 1.89 | 1.08 – 3.32 | 1  |
| Ragdoll                                     | 0.66  | 0.32 | 4.27   | 0.039  | 1.93 | 1.03 – 3.61 | 1  |
| Turkish Van                                 | -2.28 | 1.02 | 4.98   | 0.026  | 0.10 | 0.01 – 0.76 | 1  |
| <b>Food available vs. no</b>                | -0.47 | 0.13 | 12.52  | <0.001 | 0.63 | 0.49 – 0.81 | 1  |



| Oral /dental diseases                                 |            |      |       |        |       |             |   |
|-------------------------------------------------------|------------|------|-------|--------|-------|-------------|---|
| Stomatitis vs. no                                     | 0.98       | 0.36 | 7.28  | 0.007  | 2.65  | 1.31 – 5.39 | 1 |
| Periodontitis vs. no                                  | 1.29       | 0.26 | 25.32 | <0.001 | 3.63  | 2.20 – 6.01 | 1 |
| <b>Interaction age x gingivitis x dental calculus</b> |            |      | 4.71  | 0.095  |       |             |   |
| <b>Gingivitis vs. no when:</b>                        | <b>Age</b> |      |       |        |       |             |   |
|                                                       | <b>Age</b> |      |       |        |       |             |   |
|                                                       | <b>Age</b> |      |       |        |       |             |   |
| Dental calculus                                       | < 7        |      |       |        | 2.55  | 1.34–4.83   | 1 |
| No dental calculus                                    | < 7        |      |       |        | 15.11 | 7.49–30.47  | 1 |
| Dental calculus                                       | 7-<11      |      |       |        | 1.47  | 0.84–2.55   | 1 |
| No dental calculus                                    | 7-<11      |      |       |        | 2.03  | 0.71–5.81   | 1 |
| Dental calculus                                       | ≥11        |      |       |        | 2.27  | 1.23–4.20   | 1 |
| No dental calculus                                    | ≥11        |      |       |        | 3.76  | 1.57–9.01   | 1 |

143

144 **Figure 1.** Dental calculus and gingivitis by age groups in cats with and without tooth resorption.  
 145 Demonstrative bar chart of subgroup formation in the interaction between age, dental calculus and gingivitis  
 146 in the multivariable logistic regression model of the risk factors for veterinarian diagnosed tooth resorption  
 147 (Finnish cats in data collected during 12/2012–2/2015 in an internet survey). Blue = percentage of cats with  
 148 dental in the age group. Grey = percentage of cats with no dental calculus in the age group. Horizontal black  
 149 lines in blue and grey bars: proportion of gingivitis in cats with dental/without calculus under the line.

## 151 **Discussion**

152

153 This is the first study of TR and its associated factors in a large population sample [11]. Tooth

154 resorption is a disease of high prevalence, unclear pathogenesis and various clinical presentations.

155 The prevalence of veterinarian diagnosed TR in this study (3.9%) was clearly lower than in studies

156 that have clinically evaluated the teeth, usually between 29–67%. The prevalence of TR in our

157 restricted group of cats diagnosed with oral or dental disease (15%) is closer to that found in clinical

158 studies. The mean age of the population was not particularly lower than in other studies and so the

159 age of the cat population does not explain the low prevalence. The selection of the research population

160 has a major impact on the results. If the target population consists of cats seeking for dental treatment

161 routinely or because of dental disease, the prevalence of TR is expectedly higher than in healthy cats.

162 The methods used in various studies to detect the TR also affect the prevalence. Most obvious lesions

163 are found in general examination without sedation, but dental calculus can distract the examination,

164 nor can the gum line be explored. Since examination with dental explorer instrument under

165 anaesthesia only detects lesions in the cemento-enamel junction or in the crown area, dental

166 radiographs increase the prevalence even higher when lesions in the root area are detected.

167

168 In this study, the tooth resorption was diagnosed by the veterinarian, but those cats used as controls

169 had not been examined for TR as in clinical studies. This explains partly the low prevalence of TR in

170 this study. Commonly cat owners do not monitor their pets' teeth, nor have the cats regular health

171 checks by veterinarian. For these reasons and due to the progressive nature and challenging

172 diagnostics, TR may not have been noticed in the healthy cats. Open ended questions revealed that in

173 most of the cats the tooth resorption had been found during routine dental calculus removal, dental

174 radiography was used for diagnosis and most of the cats had teeth removed because of TR.

175

176 Our finding that prevalence of TR increases by age is in alignment with other studies  
177 [5,6,13,14,15,16,17,18]. Together with age, risk to have TR was also associated with gingivitis and  
178 dental calculus, leading to different odds of getting TR based on differential exposure to these factors.  
179 Gorrel's (2015) theory suggests that tooth resorption consists of at least two aetiologically different  
180 diseases: inflammatory type 1 resorptions and idiopathic type 2 resorptions [19]. Of particular interest  
181 was that gingivitis was extremely high risk to TR in young cats that did not have dental calculus. The  
182 pathophysiological logical path is that dental calculus causes gingivitis, which in turn predisposes to  
183 resorption. On the other hand, gingivitis can occur without dental calculus, and it is an interesting and  
184 anticipated finding that if young cats have gingivitis (with or without dental calculus) they also have  
185 an increased risk of resorption, which probably is inflammatory, i.e. type 1 resorption. Based on this,  
186 one might suspect that there are more inflammatory type 1 resorptions in young cats, and thus, regular  
187 tooth cleaning and dental examination could help young cats to avoid development of this type of TR  
188 in the early stage of life. However, the very high odds observed in young cats with no dental calculus  
189 may be an overestimation, as many of youngest healthy control cats without reported dental calculus  
190 had not undergone clinical dental examination. The owner may not have noticed dental calculus or  
191 gingivitis.

192

193 In addition to gingivitis and dental calculus, stomatitis and periodontitis were risk factors for TR in  
194 our study. Previous studies have shown a connection between inflammatory type 1 resorptions and  
195 stomatitis [8], but not all studies have found the connection [20]. It has been suspected that chronic  
196 stomatitis caused by feline calici virus has an impact on development of TR [1]. Low number of cats  
197 with stomatitis hindered us to study this connection properly. Periodontitis has been related to TR  
198 also in previous studies [4] and it has been linked especially with type 1 tooth resorption [8], but also  
199 the inflammation caused by tooth resorption has been suspected to cause periodontitis [21].

200

201 The continuous availability of food had a protective effect on TR. If there is food available all the  
202 time, the cat probably goes to eat more often. On the other hand, if the food is available only on  
203 certain times, the cat might eat faster and more eagerly, which can also affect the teeth. The effect of  
204 the availability of food has not been, to authors' knowledge, studied before. DuPont & DeBowes  
205 (2002) suspected dry food to cause mechanical trauma leading to type 2 tooth resorption and soft  
206 food, causing periodontitis, being a risk factor for type 1 resorption [8]. Scarlett et al. (1999) did not  
207 find a difference in prevalence between cats eating dry or soft food [4]. In our questionnaire we did  
208 not specifically ask if the cats ate dry or soft food, but we did not find association between TR and  
209 eating cooked meat/fish.

210

211 Our finding of gender not being in association with TR was in line with previous studies [4, 13]. In  
212 previous studies, indoor cats have been suspected to have higher risk of TR than outdoor cats [4], but  
213 some studies have not found a difference [16]. We did not find difference in outdoor habits of the cats  
214 with or without TR and could not reliably evaluate the effect of neutering and vaccinations due to  
215 uneven groups in neutering status and missing values in vaccinations. Considering other diseases,  
216 feline infectious peritonitis (FIP), cat flu (including herpes and calici virus), leukaemia virus (FeLV),  
217 immunodeficiency virus (FIV) and feline panleukopenia virus were not associated with TR in our  
218 study.

219

220 Varying results have been published considering the prevalence of TR in different breeds. Our results  
221 revealed that TR is highly associated with breed – being purebred was not a risk factor as itself, but  
222 the associations concerned certain breeds or breed groups. We found oriental group (Siamese,  
223 Balinese, Oriental, Seychellois), British, Cornish Rex, European, Norwegian Forest Cat and Ragdoll  
224 in higher risk for TR. Interestingly, the only breed having less TR than our comparison group of house  
225 cats was Turkish van. Siamese, Cornish Rex and European have been found to be predisposed to TR

226 also before [7,11,13]. The breed predisposition might indicate a genetic component in the aetiology  
227 of the disease. Some breeds might be genetically predisposed to dental and oral diseases in general.  
228 Exposition to several dental and oral diseases at the same time in cats have been observed in our  
229 previous study [11], in which, for example Cornish Rex and the oriental group (Siamese, Balinese,  
230 Oriental, Seychellois) were predisposed to periodontitis and stomatitis at the same time. However, it  
231 seems that not all breeds that were associated with TR have the predisposition to other dental and oral  
232 diseases. In our study, European was associated with TR whereas the previous study did not find  
233 European to be predisposed to other dental diseases [11]. The causalities between dental and oral  
234 diseases are unclear, as they can occur on their own or with other oral diseases. Breeder's influence  
235 on the prevalence of tooth resorption, stomatitis and periodontitis in the breed has also been suspected  
236 [11]. This is an interesting speculation, since this can indicate heritability or similarity in  
237 environmental factors and infections. Further analysis of the genetic background of tooth resorption  
238 would require a clinical trial where the type of resorption and dental health of the controls could be  
239 determined via radiography.

240

241 Because the data were collected in a cross-sectional manner, only the effect of permanent risk factors  
242 such as breed, age and gender can be considered causal, since they have been permanently present  
243 before the disease. However, other factor found significant are potential risk or protective factors that  
244 should be verified with clinical trials or observational follow-up studies.

245

## 246 **Conclusions**

247 We have performed the first large scale population study of TR and identify several predisposing  
248 factors. Old age, stomatitis and periodontitis were risk factors for TR. Together with age, risk to have  
249 TR was associated with gingivitis and dental calculus, suggesting that young cats that are susceptible  
250 to tooth resorption associated with gingivitis could be helped with proper dental hygiene. In addition,

251 keeping food available constantly was a potential protecting factor. Finally, certain breeds appeared  
252 more predisposed to TR, suggesting a genetic contribution to the aetiology of the disease.

253

## 254 **Materials and Methods**

255 The material for this study was part of a cross-sectional online feline health survey targeted to all  
256 Finnish cat breeders and owners. The data originated from survey responses between December 2012  
257 to February 2015 and included 8115 cat owners' responses from the feline health survey. The cats  
258 belonged to 40 different breeds and non-pedigree house cats. We used sample size requirements for  
259 breeds as described by Vapalahti et al [11]. The sample size requirements were met in purebred cats  
260 by 13 single breeds and 6 breed groups that consisted of 18 different breeds. The questionnaire  
261 included information about the cats themselves, their environment, diseases and behaviour. The  
262 diseases were divided into various categories and each category included information whether the  
263 diagnosis was made by a veterinarian or by the owner. The content, the questionnaire and data  
264 collection methods in detail and some results of the survey have been published previously  
265 [11,21,22,23]. Our data consisted of 1) basic information of the cat: breed, registration number, day  
266 of birth, possible day of death, gender, neutering, 2) environmental factors: vaccinations, outdoor  
267 habits, diet, home environment, and 3) disease categories and specific diagnoses, of which only oral  
268 and dental diseases, autoimmune diseases and viral infections were considered. The differential  
269 diagnoses in dental and oral diseases were malocclusion, gingivitis, stomatitis, periodontitis, tooth  
270 resorption (in the survey feline odontoclastic resorptive lesion FORL), dental calculus, tooth fracture  
271 and abnormal number of teeth.

272 The age of the cat was determined by the date of birth and the date of response. Age was categorized  
273 into age groups: <1 year, 1 to <3 years, 3 to <7 years, 7 to <11 years, and at least 11 years. For  
274 multivariable analysis the following age groups were used: <7 years, 7 to < 11 years, and at least 11  
275 years. The gender of the cats was coded as 'male (1) and 'female' (2) and neutering as 'yes' (1) and

276 'no' (0). The association of TR with other conditions was studied both at the level of disease  
277 categories and at specific diagnosis level. As an exception to other disease categories, in dental and  
278 oral disease category only the veterinarian's diagnoses were included in the study. In other disease  
279 categories, the initial options 'veterinarian's diagnosis' or 'own diagnosis' were summed up to option  
280 'yes' (1) if either option was selected. 'Not known' responses were coded as missing. Finally,  
281 reencoding included two options: 'yes' (1) and 'no' (0). In the analysis of specific diagnoses, coding  
282 'yes (1)' or 'no (0)' was used. The environmental questions, such as diet and vaccinations, were coded  
283 similarly.

284

285 Those cats that had been responded to have veterinarian diagnosed tooth resorption in the health  
286 survey, were determined as TR-cats. When evaluating breed associations, we used house cat as the  
287 reference group. Even though logistic regression analysis is not the primary method to be used in data  
288 based on cross-sectional study, it gives reliable results when the prevalence of the issue (here TR) is  
289 less than 5% [24] (3.9% in our study). Demographic and environmental factors of cats were examined  
290 and tabulated. The prevalence of veterinarian diagnosed tooth resorption in different breeds and age  
291 groups was calculated with cross tabulation. Cross tabulation was used also to evaluate the  
292 associations of TR with gender, other diseases and environmental factors. The 95% confidence  
293 intervals for prevalence was calculated with EpiTools [25] using the Wilson method [26]. Statistical  
294 significance of associations in cross tabulation were evaluated with Fisher's exact test for two-  
295 categorical variables, Chi-square test for multicategorical and Kruskal-Wallis test for ordinal  
296 variables. After cross tabulations, variables at level  $P < 0.2$  in basic tests were further analysed  
297 individually in multivariable logistic regression with confounding factors. According to literature,  
298 age, gender and breed were considered as confounding factors [27].

299

300 Multivariable logistic regression modelling was performed to find the best model with the most  
301 important risk factors. Interactions until the second order and multicollinearity between variables  
302 were tested. The model selection was performed by backward selection and goodness of fit statistics.  
303 P-value <0.05 of Wald chi-square was set to cut off value for significance. Goodness of fit of the  
304 model was evaluated with McFadden index and Akaike information criterion (AIC) and the predictive  
305 value by the area under the curve (AUC) of the receiver operating characteristic (ROC) curve.  
306 Multicollinearity between variables was estimated by Phi coefficient – the limit value for strong  
307 correlation was set at 0.5 [28]. Microsoft Office Excel 2010 was used for data editing and IBM SPSS  
308 Statistics, Version 22–24 for statistical analysis and SAS version 9.4, SAS Institute Inc., Cary, NC in  
309 final logistic regression modelling.

310

## 311 **Ethical statement**

312 The data in this study was collected 2012-2015 using an online feline health survey as published by  
313 Vapalahti et al.<sup>11</sup>. The data was collected before the onset of the GDPR regulation according to the  
314 Finnish legislation <https://www.finlex.fi/fi/laki/ajantasa/1999/19990523>. This survey study focused  
315 on the investigation of cats and not human participants or the cat owners, and therefore a specific  
316 ethical approval was not needed. As for the study participants (cat owners), we collected only names  
317 and addresses. Owners were informed that the participation is voluntary, confidential, and that the  
318 data is used only for scientific purposes. We received informed consents from all participants.

319

## 320 **Additional Information**

### 321 **Acknowledgements**

322 We thank the cat owners who participated in the original health survey.



323

## 324 **Competing Interests**

325 The authors have declared that no competing interests exist.

326

## 327 **References**

- 328 1. Reiter, A., Mendoza, K. Feline odontoclastic resorptive lesions – an unsolved enigma in  
329 veterinary dentistry. *Vet Clin Small Anim.* 2002; 32: 791-837.
- 330 2. Gorrel, C. *Small Animal Dentistry*. 1 st ed. China: Saunders Elsevier; 2008.
- 331 3. Okuda, A., Harvey, C. Etiopathogenesis of feline dental resorptive lesions. *Vet Clin Small*  
332 *Anim.* 1992; 22: 1385-1403.
- 333 4. Scarlett, J. M., Saidla, J., Hess, J. Risk factors for odontoclastic resorptive lesions in cats.  
334 *JAAHA.* 1999; 35: 188-192.
- 335 5. DeLaurier, A., Boyde, A., Jackson, B., Horton, M., Price, J. Identifying early osteoclastic  
336 resorptive lesions in feline teeth: a model for understanding the origin of multiple idiopathic  
337 root resorption. *J. Periodont Res.* 2009; 44: 248-257.
- 338 6. Harvey, C. Feline dental resorptive lesions. *Semin Vet Med Surg.* 1993; 8: 187-196.
- 339 7. van Wessum, R., Harvey, C., Hennet, P. Feline dental resorptive lesions prevalence patterns.  
340 *Vet Clin Small Anim.* 1992; 22: 1405-1415.
- 341 8. DuPont, G., DeBowes, L. Comparison of periodontitis and root replacement in cat teeth with  
342 resorptive lesions. *J. Vet Dent.* 2002; 19: 71-75.
- 343 9. DuPont, G. Radiographic evaluation and treatment of feline dental resorptive lesions. *Vet Clin*  
344 *Small Anim.* 2005; 35: 943-962.
- 345 10. Girard, N., Servet, E., Biourge, V., Hennet, P. Feline tooth resorption in a colony of 109 cats.  
346 *J. Vet Dent.* 2008; 25: 166-174.
- 347 11. Vapalahti, K., Virtala, A-M., Joensuu, T., Tiira, K., Tähtinen, J., Lohi, H. Health and  
348 behavioral survey of over 8000 Finnish cats. *Frontiers Vet Sci.* 2016; 3: 70.
- 349 12. Greiner, M., Pfeiffer, D., Smith, R. D. Principles and practical application of the receiver-  
350 operating characteristic analysis for diagnostic tests. *Prev Vet Med.* 2000; 45: 23–41.
- 351 13. Coles, S. The prevalence of buccal cervical root resorptions in Australian cats. *J. Vet Dent.*  
352 1990; 7: 14–16.
- 353 14. Lund, E., Bohacek, L., Dahlke, J., King, V., Kramek, B., Logan, E. Prevalence and risk factors  
354 for odontoclastic resorptive lesions in cats. *JAVMA.* 1998; 212: 393-395.
- 355 15. Ingham, K., Gorrel, C., Blackburn, J., Farnsworth, W. Prevalence of odontoclastic resorptive  
356 lesions in a population of clinically healthy cats. *JSA.* 2001; 42: 439-443.
- 357 16. Pettersson, A., Mannerfelt, T. Prevalence of dental resorptive lesions in Swedish cats. *J. Vet*  
358 *Dent.* 2003; 20: 140-142.
- 359 17. Reiter, A., Lyon, K., Nachreiner, R., Shofer, F. Evaluation of calciotropic hormones in cats  
360 with odontoclastic resorptive lesions. *AJVR.* 2005; 66: 1446-1452.

- 361 18. Mestrinho, L., Runhau, J., Braganca, M., Niza, M. Risk assessment of feline tooth resorption:  
362 a portuguese clinical case control study. *J. Vet Dent.* 2013; 30: 78-83.
- 363 19. Gorrel, C. Tooth resorption in cats: patophysiology and treatment options. *JFMS.* 2015; 17:  
364 37-43.
- 365 20. Reiter, A., Lewis, J., Okuda, A. Update on the etiology of tooth resorption in domestic cats.  
366 *Vet Clin Small Anim.* 2005; 35: 913-942.
- 367 21. Lemmons, M. Clinical feline dental radiography. *Vet Clin Small Anim.* 2013; 43: 533-554.
- 368 22. Ahola, M. K., Vapalahti, K., Lohi, H. Early weaning increases aggression and stereotypic  
369 behaviour in cats. *Sci Rep.* 2017; 7: 10412.
- 370 23. Salonen, M. K., Vapalahti, K., Mäki-Tanila, A., Lohi, H. Breed differences of heritable  
371 behaviour traits in cats. *Sci Rep.* 2019; 9: 7949.
- 372 24. Dohoo, I., Martin, W., Stryhn, H. *Veterinary Epidemiologic Research.* The University of  
373 Prince Edward Island, Ver Inc, Charlottetown; 2009.
- 374 25. Sergeant, ESG. Epitools epidemiological calculators. Aus Vet animal health services and  
375 Australian biosecurity cooperative research centre for emerging infectious disease.  
376 <http://epitools.ausvet.com.au> (2017).
- 377 26. Brown, L. D., Cat, T. T., DasGupta, A. Interval estimation for a proportion. *Stat Sci.* 2001;  
378 16: 101-133.
- 379 27. Houe, H., Ersbøll, A. K., Toft, N. *Introduction to Veterinary Epidemiology.* Biofolia,  
380 Denmark; 2004.
- 381 28. Pett, M. A. *Nonparametric Statistics for Health Care Research: Statistics for Small Samples*  
382 *and Unusual Distributions.* Sage Publications, United States; 1997.
- 383

## 384 **Author contributions**

385 H.N., A-M.V. K.V. and H.L conceptualized and designed the experiment. H.N. made the preliminary  
386 analysis and K.V. performed the multivariable analyses. K.V. and H.N. drafted the manuscript, which  
387 was edited and contributed by H.L and A-M.V. All authors approved the final version of the  
388 manuscript.

389

## 390 **Supporting information**

391 Data available: Supplementary Tables S1-S4 and S5

392

## 393 **Figure Legends**

394

395 **Figure 1.** Dental calculus and gingivitis by age groups in cats with and without tooth resorption.  
396 Demonstrative bar chart of subgroup formation in the interaction between age, dental calculus and

397 gingivitis in the multivariable logistic regression model of the risk factors for veterinarian diagnosed  
398 tooth resorption (Finnish cats in data collected during 12/2012–2/2015 in an internet survey). Blue =  
399 percentage of cats with dental in the age group. Grey = percentage of cats with no dental calculus in  
400 the age group. Horizontal black lines in blue and grey bars: proportion of gingivitis in cats with  
401 dental/without calculus under the line.  
402

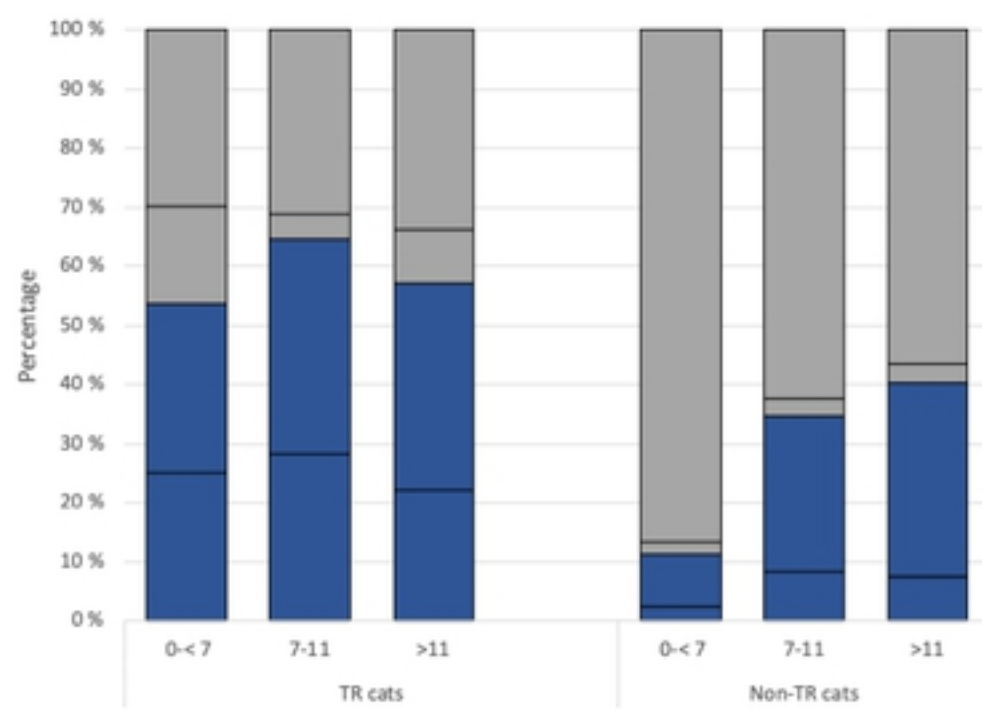

Figure 1
